# Supplementary material for: The Urine Metabolome of Young Autistic Children Correlates with Their Clinical Profile Severity
Source: PubMed Central journal article supplement (PMC7700197; doi:10.3390/metabo10110476), 2020-11-23
Supplement: metabolites-10-00476-s001.pdf [file metabolites-10-00476-s001.pdf]

*The urine metabolome of young autistic children correlates with the severity of clinical profile.*  
**Supplementary Materials**

**Table S1.** List of metabolites ruled out from statistical analysis

|                         |
|-------------------------|
| Valero lactam           |
| 5-Hydroxyhexanoic acid  |
| 3-Methylglutaconic acid |
| Ornithine lactam        |
| Malic acid              |
| Taurine                 |
| Anhydroglucose          |
| 3-Phosphoglycerate      |
| Fructose                |
| Chiroinositol           |
| N-Acetylgalactosamine   |

**Table S2.** List of unknown metabolites recognized in this study by GC-MS.

|                |                |
|----------------|----------------|
| Unknown 358 U  | Sugar 1382     |
| Unknown 794 U  | Unknown 1457 U |
| U 807          | Sugar 1602     |
| Acid 823       | Sugar 1624     |
| Unknown 835 U  | Monosacch E    |
| Unknown 906 U  | Sugar 1646     |
| U D            | U C            |
| U 972          | A231002        |
| U 987          | Monosacch 1886 |
| A160001        | U A            |
| Unknown 1089 U | Unknown 1910   |
| Sugar 1369     | Disaccharide   |
| A201005        |                |

*The urine metabolome of young autistic children correlates with the severity of clinical profile.*  
**Supplementary Materials**

**Table S3.** List of urine metabolites significantly correlating with scores computed by the Diagnostic Observation Schedule Second Edition with Calibrated Severity Score (ADOS-2 CSS)

| METABOLITE                                  | SPEARMAN'S CORRELATION |       |
|---------------------------------------------|------------------------|-------|
|                                             | $\rho$                 | $p$   |
| 2-Hydroxyacrylic acid                       | 0.46                   | 0.028 |
| Allantoin                                   | 0.44                   | 0.025 |
| Adipic acid                                 | 0.50                   | 0.023 |
| 3-(3-Hydroxyphenyl)-3-hydroxypropanoic acid | 0.46                   | 0.020 |
| Xylose                                      | 0.45                   | 0.021 |
| 1-Deoxypentitol                             | 0.45                   | 0.020 |
| Palmitic acid                               | 0.65                   | 0.003 |
| Lyxonic acid                                | 0.38                   | 0.044 |
| Quinolinic acid                             | 0.43                   | 0.033 |
| Tri hydroxypentanoic acid                   | 0.40                   | 0.033 |

The urine metabolome of young autistic children correlates with the severity of clinical profile.  
**Supplementary Materials**

**Table S4.** Data matrix combining scores from RBS-R and ABC questionnaires with urine metabolome of ASD children

| URINE METABOLOME IDENTIFICATION | SCORE |     | URINE METABOLOME IDENTIFICATION | SCORE |     |
|---------------------------------|-------|-----|---------------------------------|-------|-----|
|                                 | RBS-R | ABC |                                 | RBS-R | ABC |
| <i>Cluster 1 (n=11)</i>         |       |     | <i>Cluster 2 (n=20)</i>         |       |     |
| #69                             | 15    | 18  | #46                             | 34    | 50  |
| #27                             | 24    | 80  | #34                             | 47    | 38  |
| #61                             | 65    | 70  | #4                              | 24    | 44  |
| #28                             | 51    | 59  | #21                             | 33    | 48  |
| #37                             | 9     | 34  | #6                              | 24    | 42  |
| # 2                             | 3     | 44  | #23                             | 35    | 50  |
| #75                             | 43    | 54  | #30                             | 8     | 17  |
| #19                             | 94    | 128 | #55                             | 17    | 32  |
| #22                             | 38    | 75  | #33                             | 31    | 81  |
| #49                             | 36    | 51  | #67                             | 19    | 45  |
| #8                              | 2     | 12  | #58                             | 35    | 23  |
|                                 |       |     | #15                             | 36    | 46  |
|                                 |       |     | #11                             | 12    | 23  |
|                                 |       |     | #85                             | 4     | 10  |
|                                 |       |     | #60                             | 39    | 94  |
|                                 |       |     | #13                             | 2     | 4   |
|                                 |       |     | #71                             | 35    | 49  |
|                                 |       |     | #39                             | 6     | 49  |
|                                 |       |     | #7                              | 23    | 38  |
|                                 |       |     | #10                             | 23    | 29  |

The urine metabolome of young autistic children correlates with the severity of clinical profile.  
**Supplementary Materials**

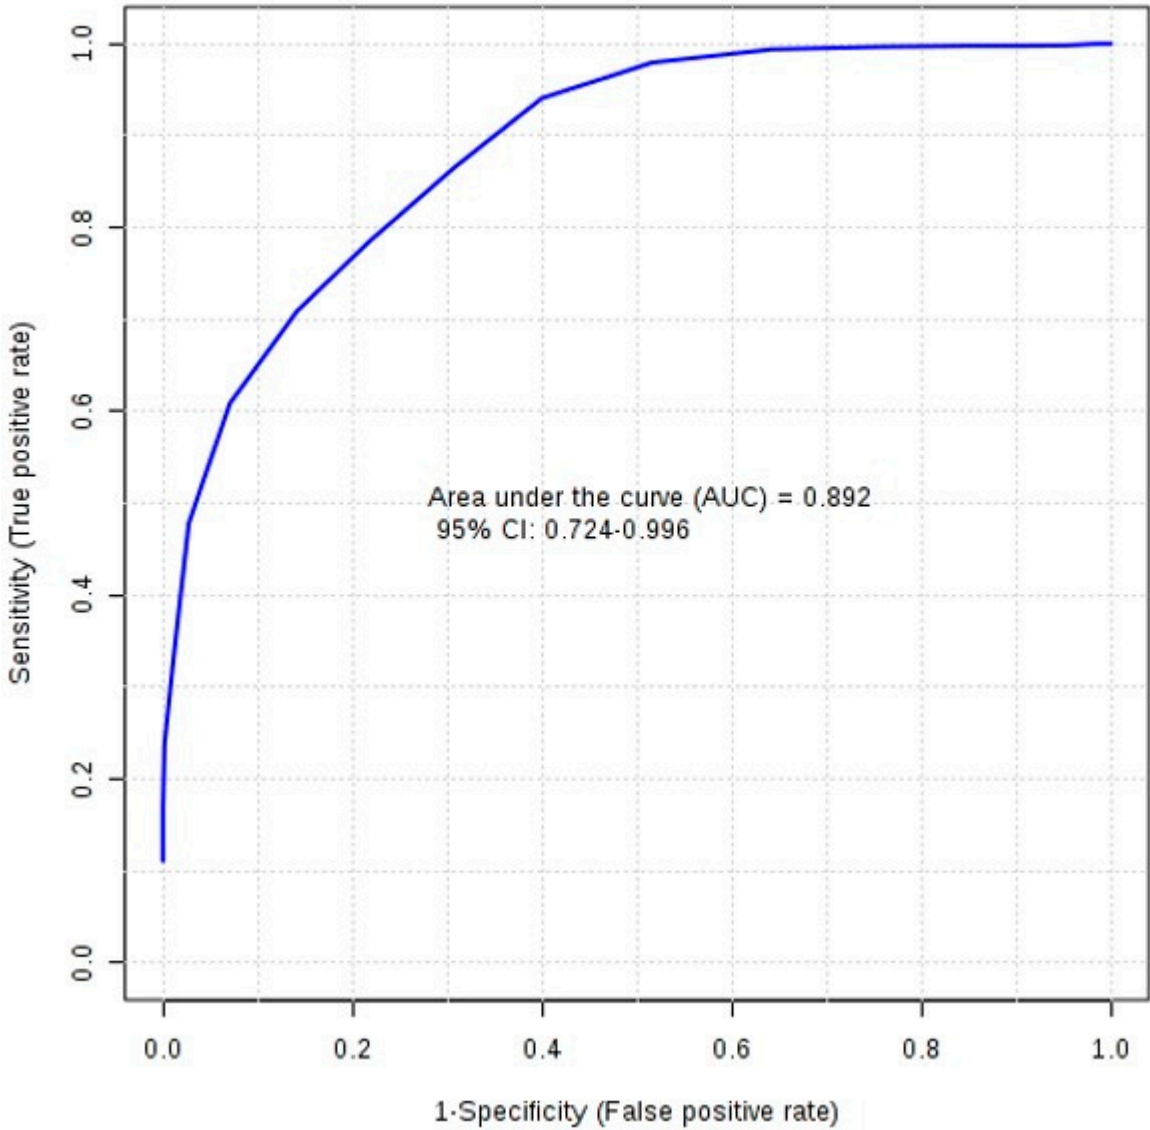

**Figure S1.** ROC plot referred to the comparison between typically developed children and ASD children

*The urine metabolome of young autistic children correlates with the severity of clinical profile.*  
**Supplementary Materials**

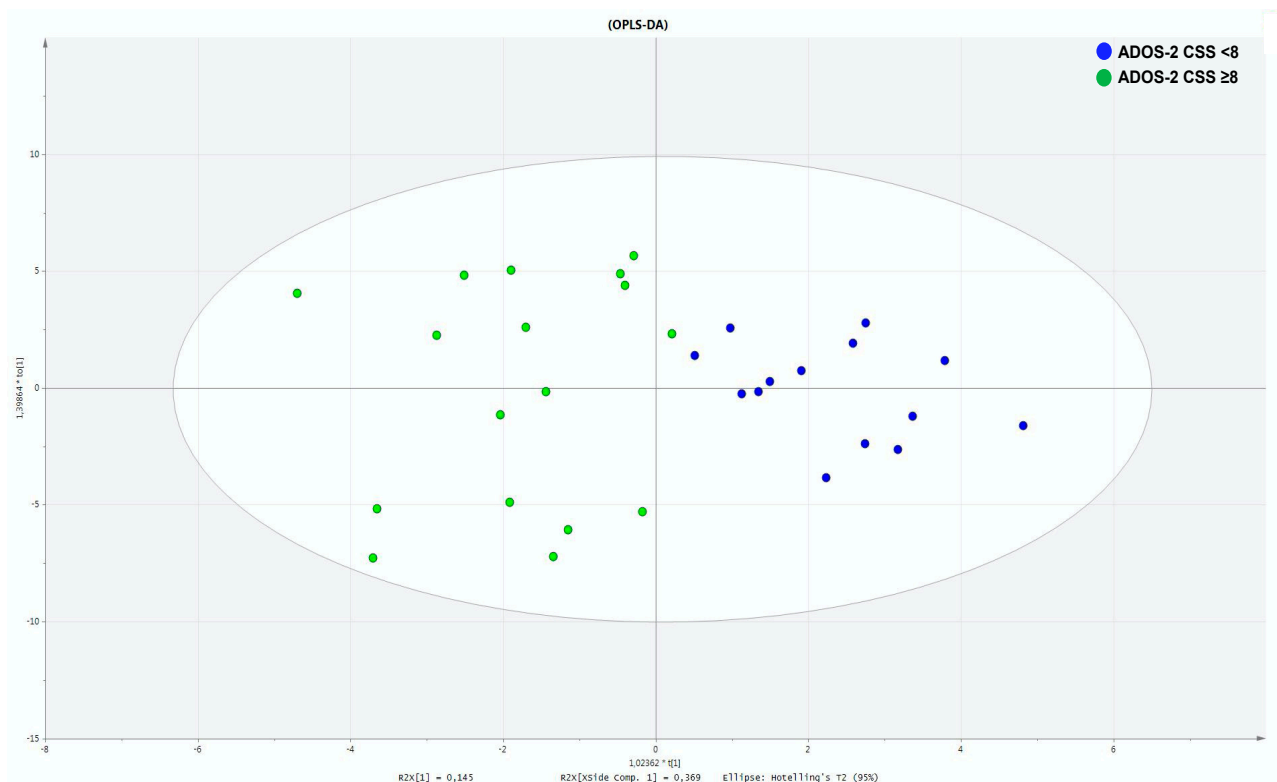

**Figure S2.** OPLS-DA score plot comparing the urine metabolic profile of the subgroup of ASD children with ADOS-2 CSS score  $\geq 8$  (blue dots) and that of ASD children with ADOS-2 CSS score  $< 8$  (red dots). The robustness of the model is supported by  $R^2 X = 0.513$ ,  $R^2 Y = 0.722$ ,  $Q^2 = 0.468$  and confirmed by the analysis of variance CV-ANOVA ( $p=0.0092$ ).
